# Supplementary material for: Serum Adipsin Levels throughout Normal Pregnancy and Preeclampsia
Source: PubMed Central journal article supplement (PMC4735521; doi:10.1038/srep20073), 2016-02-01
Supplement: srep20073-s1.pdf [file srep20073-s1.pdf]

Supplementary Information

**Serum Adipsin Levels throughout Normal Pregnancy and Preeclampsia**

Natalia E. Poveda, María F. Garcés, Carlos E. Ruiz-Linares, Diana Varón, Sergio Valderrama, Elizabeth Sanchez, Adriana Castiblanco-Cortes, Yessica Agudelo-Zapata, Héctor Fabio Sandoval-Alzate, Luis G. Leal, Edith Ángel-Müller, Ariel I. Ruíz-Parra, Angélica M. González-Clavijo, Carlos Diéguez, Rubén Nogueiras and Jorge E. Caminos

**Supplemental Table 1. Anthropometric, clinical and biochemical parameters and hormonal levels of healthy eumenorrheic women**

| Variable                             | Eumenorrheic Women      |                         |         |
|--------------------------------------|-------------------------|-------------------------|---------|
|                                      | Follicular phase (n=20) | Luteal phase (n=20)     | p-value |
| Progesterone, ng/mL (mean ± SD)      | 0.4952 (0.3284-0.6569)  | 6.428 (3.785-13.45)     | 0.00*** |
| Adipsin, ng/mL (mean ± SD)           | 5357.9 (+/- 714.4)      | 5393.9 (+/- 921.5)      | 0.89    |
| Leptin, pg/mL (mean ± SD)            | 16316.0(+/- 2304.729)   | 23018.85 (+/- 4711.553) | 0.00*** |
| Age, years, (median (IQR))           | 20 (19-23.25)           |                         |         |
| Height, meters (mean ± SD)           | 1.6 (+/- 0.1)           |                         |         |
| Weight, Kg (mean ± SD)               | 55.5 (+/- 6.4)          |                         |         |
| BMI, Kg/m <sup>2</sup> (mean ± SD)   | 21.6 (+/- 2.2)          |                         |         |
| Systolic BP, mmHg (mean ± SD)        | 108.3 (+/- 8.3)         |                         |         |
| Diastolic BP, mmHg (mean ± SD)       | 71.2 (+/- 7.2)          |                         |         |
| Mean BP, mmHg (mean ± SD)            | 83.6 (+/- 6.2)          |                         |         |
| Insulin, ng/mL (mean ± SD)           | 9.1 (+/- 5)             |                         |         |
| Total cholesterol, mg/dL (mean ± SD) | 157.9 (+/- 24.8)        |                         |         |
| HDL-cholesterol, mg/dL (mean ± SD)   | 52.1 (+/- 8.4)          |                         |         |
| Triglycerides, mg/dL (mean ± SD)     | 75.7 (+/- 19.3)         |                         |         |
| VLDL-cholesterol, mg/dL (mean ± SD)  | 15 (+/- 3.9)            |                         |         |
| LDL-cholesterol, mg/dL (mean ± SD)   | 109 (+/- 21.9)          |                         |         |
| PCR, mg/L (mean ± SD)                | 1.5 (+/- 0.8)           |                         |         |
| Glucose, mg/dL (mean ± SD)           | 84.9 (+/- 7.3)          |                         |         |
| HOMA-IR (mean ± SD)                  | 1.9 (+/- 1.1)           |                         |         |

Non-normally distributed data are listed as median (IQR). Normally distributed data are listed as mean ± SD. HOMA (Homeostasis Model Assessment). \*\*\*p-value < 0.001.

**Supplementary Table 2. A comparison of anthropometric, clinical and biochemical parameters and adipsin levels between healthy women across pregnancy and three months postpartum and preeclamptic women**

| Variable                              | EP                       |                               |         | MP                       |                           |         | LP                       |                               |         | PP                       |          |
|---------------------------------------|--------------------------|-------------------------------|---------|--------------------------|---------------------------|---------|--------------------------|-------------------------------|---------|--------------------------|----------|
|                                       | Healthy pregnancy (n=54) | Preeclamptic pregnancy (n=18) | p-value | Healthy pregnancy (n=54) | Preeclamptic women (n=18) | p-value | Healthy pregnancy (n=54) | Preeclamptic pregnancy (n=18) | p-value | Healthy pregnancy (n=18) | p-value* |
| Age, years, median (IQR)              | 23 (19-30)               | 19.5 (18.25-25.5)             | 0.14    | 23 (19-30)               | 19.5 (18.25-25.5)         | 0.14    | 23 (19-30)               | 19.5 (18.25-25.5)             | 0.14    | 23 (19-24.75)            | 0.49     |
| Weight, Kg (mean ± SD)                | 55.6 (+/- 6.9)           | 58.5 (+/- 6.7)                | 0.14    | 60.2 (+/- 7.6)           | 65.6 (+/- 7.7)            | 0.01*   | 64.3 (+/- 7.4)           | 73.2 (+/- 8.5)                | 0.00*** | 57 (+/- 6.4)             | 0.00***  |
| Height, meters, (median (IQR))        | 1.58 (1.542-1.598)       | 1.585 (1.53-1.618)            | 0.75    | 1.58 (1.542-1.598)       | 1.585 (1.53-1.618)        | 0.75    | 1.58 (1.542-1.598)       | 1.585 (1.53-1.618)            | 0.75    | 1.558 (1.542-1.58)       | 0.57     |
| BMI, Kg/m <sup>2</sup> (median (IQR)) | 22.34 (20.46-23.7)       | 23.14 (21.63-24.75)           | 0.12    | 23.96 (22.52-25.89)      | 26.09 (24.06-28.04)       | 0.01*   | 25.95 (24.4-27.48)       | 29.74 (27.36-30.59)           | 0.00*** | 23.63 (21.54-25.05)      | 0.00***  |
| Gestational age, weeks (median (IQR)) | 12.1 (11.5-12.5)         | 12.25 (11.6-12.58)            | 0.75    | 24.3 (24.13-24.6)        | 24.3 (24.1-24.5)          | 0.87    | 34.4 (34.2-35.2)         | 35.2 (34.28-35.58)            | 0.09    | -                        | -        |
| Systolic BP, mmHg (median (IQR))      | 95 (90-100)              | 108 (98.5-110)                | 0.00*** | 90 (86-100)              | 100 (100-110)             | 0.00*** | 97 (90-102)              | 104 (100-110)                 | 0.00**  | 102 (90-109)             | 0.30     |
| Diastolic BP, mmHg (median (IQR))     | 60 (60-63.5)             | 65 (60-70)                    | 0.10    | 60 (58-60)               | 63 (60-68)                | 0.01**  | 62 (60-69.5)             | 60 (60-70)                    | 0.81    | 62 (60-64)               | 0.86     |
| Mean BP, mmHg (mean ± SD)             | 72.3 (+/- 5.5)           | 78.2 (+/- 7.5)                | 0.01**  | 71 (+/- 5.2)             | 77.6 (+/- 5.6)            | 0.00*** | 74.2 (+/- 7.1)           | 77 (+/- 4)                    | 0.05    | 75 (+/- 6.8)             | 0.68     |
| Glucose, mg/dL (median (IQR))         | 78 (73-82.75)            | 80.5 (74.65-84)               | 0.12    | 72 (69-77.75)            | 78.5 (70-81)              | 0.03*   | 73.5 (69-77.75)          | 70.6 (69-75)                  | 0.54    | 79 (77-83)               | 0.00***  |
| Insulin, ng/mL (median (IQR))         | 9.5 (5.75-12)            | 11.5 (10.3-13.3)              | 0.04*   | 11.2 (8.3-14.5)          | 14.75 (11.05-18.32)       | 0.00**  | 12.3 (8.05-17.52)        | 13.5 (11.42-17.82)            | 0.48    | 5.8 (3.9-8.75)           | 0.00***  |

|                                                     |                           |                           |             |                            |                            |             |                            |                            |             |                           |             |
|-----------------------------------------------------|---------------------------|---------------------------|-------------|----------------------------|----------------------------|-------------|----------------------------|----------------------------|-------------|---------------------------|-------------|
| HOMA-IR<br>(median<br>(IQR))                        | 1.695 (1.129-<br>2.217)   | 2.351 (1.889-<br>2.508)   | 0.04<br>*   | 1.9 (1.452-<br>2.631)      | 2.946 (2.195-<br>3.649)    | 0.00<br>*** | 2.255 (1.575-<br>3.139)    | 2.451 (2.116-<br>3.348)    | 0.61        | 1.146 (0.7481-<br>1.75)   | 0.00<br>*** |
| Total<br>cholesterol,<br>mg/dL<br>(mean ± SD)       | 166.3 (+/-<br>31.3)       | 182.2 (+/- 21.3)          | 0.03<br>*   | 218.7 (+/-<br>37.5)        | 213 (+/- 33.6)             | 0.55        | 247.9 (+/-<br>48.4)        | 237.7 (+/- 50.8)           | 0.46        | 158.5 (+/- 31.3)          | 0.00<br>*** |
| HDL-<br>cholesterol,<br>mg/dL<br>(mean ± SD)        | 57.4 (+/- 10.8)           | 50.1 (+/- 10.6)           | 0.02<br>*   | 69.3 (+/- 11.5)            | 62.5 (+/- 14.8)            | 0.09        | 67.2 (+/- 11.4)            | 55.4 (+/- 7.2)             | 0.00<br>*** | 48.2 (+/- 7.4)            | 0.00<br>*** |
| LDL-<br>cholesterol,<br>mg/dL<br>(mean ± SD)        | 119.3 (+/-<br>33.3)       | 124.2 (+/- 40.5)          | 0.65        | 146.7 (+/-<br>43.2)        | 145.1 (+/- 43.6)           | 0.90        | 157 (+/- 41.5)             | 162 (+/- 70.7)             | 0.78        | 90.3 (+/- 24.1)           | 0.00<br>*** |
| VLDL-<br>cholesterol,<br>mg/dL<br>(median<br>(IQR)) | 21.58 (17.54-<br>25.98)   | 21.05 (16.23-<br>26.48)   | 0.77        | 35.46 (28.06-<br>43.24)    | 32.8 (27.97-<br>36.45)     | 0.13        | 46.54 (40.37-<br>56.14)    | 46.86 (32.12-<br>62.19)    | 0.76        | 13 (10.22-19)             | 0.00<br>*** |
| Triglycerides<br>, mg/dL<br>(median<br>(IQR))       | 107.9 (87.7-<br>129.9)    | 105.2 (81.15-<br>132.4)   | 0.77        | 177.3 (140.3-<br>216.2)    | 164 (139.8-<br>182.2)      | 0.13        | 223.6 (201.1-<br>282.4)    | 243.7 (183.3-<br>311)      | 0.40        | 66 (51.5-96)              | 0.00<br>*** |
| Adipsin,<br>ng/mL<br>(mean ± SD)                    | 4381 (+/-<br>663.4)       | 4764.4 (+/-<br>1414.4)    | 0.28        | 4083 (+/-<br>655.1)        | 3927.4 (+/-<br>674.8)      | 0.40        | 4314.5 (+/-<br>665)        | 5932.1 (+/-<br>2036.2)     | 0.00<br>**  | 6401.7 (+/-<br>1148.8)    | 0.00<br>*** |
| Leptin<br>pg/mL<br>(mean ± SD)                      | 23461.12<br>(+/- 9011.40) | 33734.14(+/-<br>11928.92) | 0.00<br>*** | 34112.42 (+/-<br>20165.60) | 61060.55 (+/-<br>23970.14) | 0.00<br>*** | 48144.76 (+/-<br>31264.72) | 89780.93 (+/-<br>41171.88) | 0.00<br>*** | 17028.81 (+/-<br>3935.63) | 0.00<br>*** |

Non-normally distributed data are listed as median (IQR). Normally distributed data are listed as mean ± SD. EP=early pregnancy, MP=middle pregnancy, LP=late pregnancy, PP=three months postpartum. HOMA (Homeostasis Model Assessment). \*Test of mean differences between normal LP and normal PP groups. \* P-value < 0.05, \*\* p-value < 0.01, \*\*\*p-value < 0.001.

**Supplemental Table 3. Univariate partial correlations between Adipsin and leptin, anthropometric/biochemical parameters.**

| Variable                 | Eumenorrheic women (n=20) |            | EP                       |             |                               |             | MP                       |         |                               |         | LP                       |            |                               |             | Healthy pregnant postpartum (n=18) |           |
|--------------------------|---------------------------|------------|--------------------------|-------------|-------------------------------|-------------|--------------------------|---------|-------------------------------|---------|--------------------------|------------|-------------------------------|-------------|------------------------------------|-----------|
|                          |                           |            | Healthy pregnancy (n=54) |             | Preeclamptic pregnancy (n=18) |             | Healthy pregnancy (n=54) |         | Preeclamptic pregnancy (n=18) |         | Healthy pregnancy (n=54) |            | Preeclamptic pregnancy (n=18) |             |                                    |           |
|                          | Correlation               | P-value    | Correlation              | P-value     | Correlation                   | P-value     | Correlation              | P-value | Correlation                   | P-value | Correlation              | P-value    | Correlation                   | P-value     | Correlation                        | P-value   |
| Weight, Kg               | -0.08                     | 0.63       | 0.49                     | 0.00<br>*** | 0.32                          | 0.32        | 0.27                     | 0.05    | 0.28                          | 0.33    | 0.38                     | 0.01<br>** | 0.02                          | 0.95        | 0.09                               | 0.73      |
| Height, meters           | -0.28                     | 0.08       | 0.31                     | 0.02<br>*   | -0.42                         | 0.17        | 0.21                     | 0.15    | -0.12                         | 0.69    | 0.01                     | 0.97       | -0.09                         | 0.80        | 0.05                               | 0.83      |
| BMI, Kg/m <sup>2</sup>   | 0.03                      | 0.84       | 0.34                     | 0.01<br>*   | 0.87                          | 0.00<br>*** | 0.20                     | 0.17    | 0.37                          | 0.19    | 0.39                     | 0.01<br>** | 0.09                          | 0.80        | 0.51                               | 0.03<br>* |
| Systolic BP, mmHg        | -0.07                     | 0.68       | 0.19                     | 0.17        | -0.33                         | 0.29        | -0.01                    | 0.95    | 0.15                          | 0.62    | 0.41                     | 0.00<br>** | -0.77                         | 0.00<br>*** | 0.04                               | 0.87      |
| Diastolic BP, mmHg       | -0.50                     | 0.00<br>** | 0.12                     | 0.42        | -0.11                         | 0.75        | -0.01                    | 0.95    | -0.45                         | 0.09    | 0.22                     | 0.14       | 0.53                          | 0.08        | 0.55                               | 0.02<br>* |
| Mean BP, mmHg            | -0.32                     | 0.05       | 0.21                     | 0.15        | -0.20                         | 0.54        | -0.04                    | 0.81    | -0.35                         | 0.21    | 0.28                     | 0.05       | -0.32                         | 0.34        | 0.45                               | 0.07      |
| Glucose, mg/dL           | 0.04                      | 0.79       | 0.07                     | 0.60        | 0.16                          | 0.63        | 0.27                     | 0.06    | 0.16                          | 0.59    | 0.07                     | 0.62       | -0.77                         | 0.00<br>*** | 0.34                               | 0.18      |
| Insulin, ng/mL           | -0.02                     | 0.89       | 0.21                     | 0.14        | 0.14                          | 0.67        | 0.02                     | 0.90    | -0.12                         | 0.70    | 0.02                     | 0.90       | 0.52                          | 0.09        | 0.15                               | 0.54      |
| HOMA-IR                  | 0.02                      | 0.90       | 0.20                     | 0.15        | 0.18                          | 0.58        | 0.04                     | 0.77    | -0.11                         | 0.70    | 0.02                     | 0.87       | 0.35                          | 0.29        | 0.17                               | 0.49      |
| Total cholesterol, mg/dL | 0.12                      | 0.45       | -0.23                    | 0.10        | 0.00                          | 0.99        | 0.16                     | 0.27    | -0.03                         | 0.93    | 0.14                     | 0.35       | -0.76                         | 0.00<br>**  | 0.05                               | 0.85      |
| HDL-cholesterol, mg/dL   | -0.29                     | 0.07       | -0.07                    | 0.61        | 0.57                          | 0.04<br>*   | 0.12                     | 0.42    | 0.26                          | 0.37    | -0.03                    | 0.82       | 0.32                          | 0.35        | 0.06                               | 0.82      |
| LDL-cholesterol, mg/dL   | 0.23                      | 0.17       | -0.22                    | 0.12        | 0.02                          | 0.95        | -0.05                    | 0.75    | 0.30                          | 0.30    | 0.15                     | 0.31       | -0.92                         | 0.00<br>*** | -0.16                              | 0.53      |
| Triglycerides, mg/dL     | 0.12                      | 0.48       | -0.11                    | 0.42        | -0.57                         | 0.04<br>*   | 0.27                     | 0.06    | 0.10                          | 0.73    | 0.01                     | 0.96       | -0.09                         | 0.80        | -0.18                              | 0.48      |
| Leptin, pg/mL            |                           |            |                          |             |                               |             |                          |         |                               |         |                          |            |                               |             |                                    |           |
| Follicular               | -0.16                     | 0.48       | -0.03                    | 0.8         | 0.1                           | 0.67        | -0.17                    | 0.21    | 0.27                          | 0.30    | 0.17                     | 0.20       | 0.39                          | .080        | 0.35                               | 0.12      |

Luteal            -0.09            0.71

---

EP=early pregnancy, MP=middle pregnancy, LP=late pregnancy, PP=three months postpartum. HOMA (Homeostasis Model Assessment). \* P-value < 0.05, \*\* p-value < 0.01, \*\*\*p-value < 0.001.

Supplementary Figure 1 (A-G). Correlations between adipsin levels and anthropometric, clinical, and biochemical features in preeclamptic women

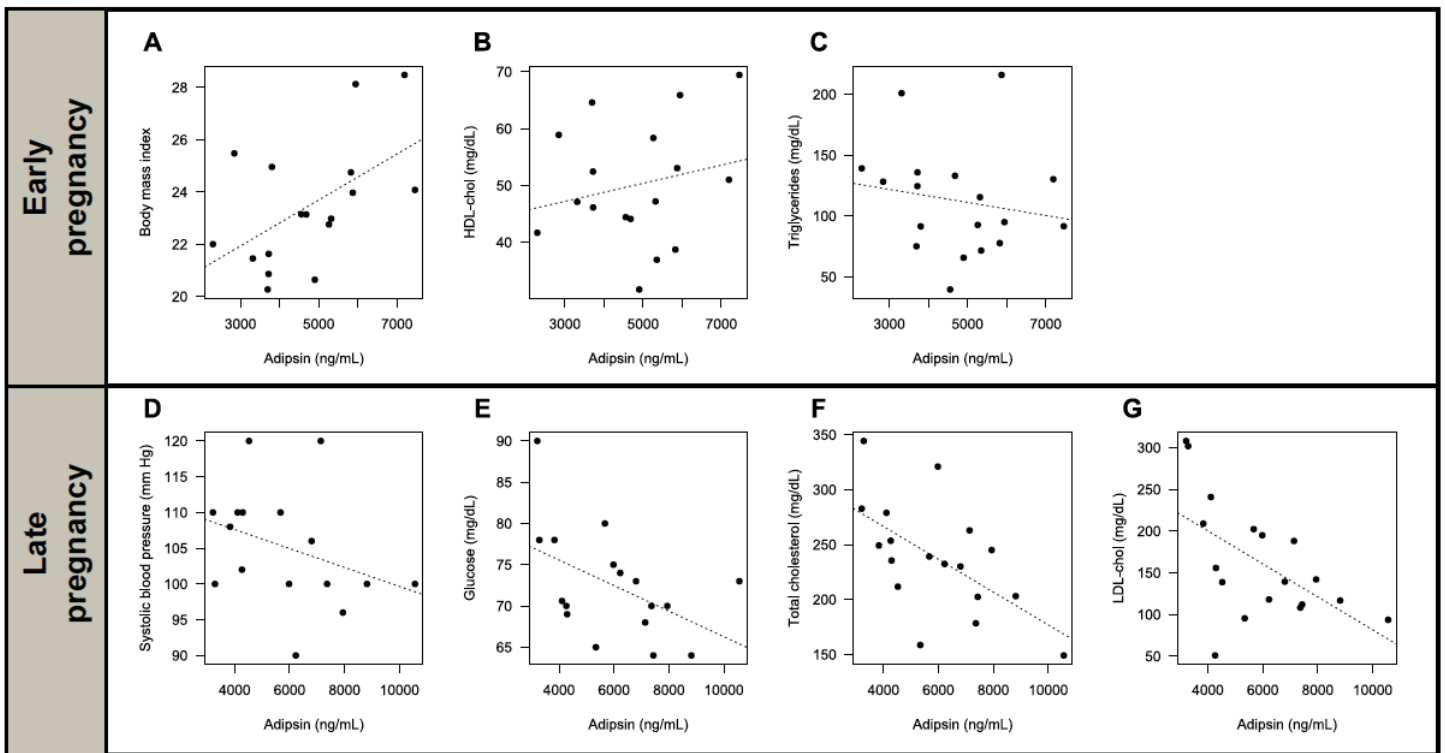

**Supplementary Figure 1. Scatterplots of anthropometric/biochemical variables correlated with adipsin in preeclamptic women. (A-B)** Positive correlations between serum adipsin levels and BMI and HDL-cholesterol levels in early pregnancy. (C) Negative correlation between adipsin levels and triglycerides in early pregnancy. (D-G) Negative correlations between adipsin levels and systolic BP, glucose levels, total cholesterol, and LDL-cholesterol levels in late pregnancy.
